# Supplementary material for: Importance of polyelectrolyte modification for rectifying the ionic current in conically shaped nanochannels
Source: Royal Society of Chemistry journal article supplement (doi:10.1039/c6cp07693a), 2017-01-01
Supplement: c6cp07693a1.pdf [file c6cp07693a1.pdf]

## Electronic Supplementary Information (ESI)

### Importance of polyelectrolyte modification for rectifying the ionic current in conically shaped nanochannels

Shiojenn Tseng,<sup>1</sup> Hou-Hsueh Wu,<sup>2</sup> Chih-Yuan Lin,<sup>2</sup> Jyh-Ping Hsu<sup>2,\*</sup>

<sup>1</sup>Department of Mathematics, Tamkang University, New Taipei City, Taiwan 25137

<sup>2</sup>Department of Chemical Engineering, National Taiwan University, Taipei, Taiwan 10617

Tel: 886-2-23637448, Fax: 886-2-23623040, E-mail: jphsu@ntu.edu.tw

#### Supporting Information

#### Contours of the dimensionless counterions (cations) concentration $c_1^*$ near the base region of a nanopore

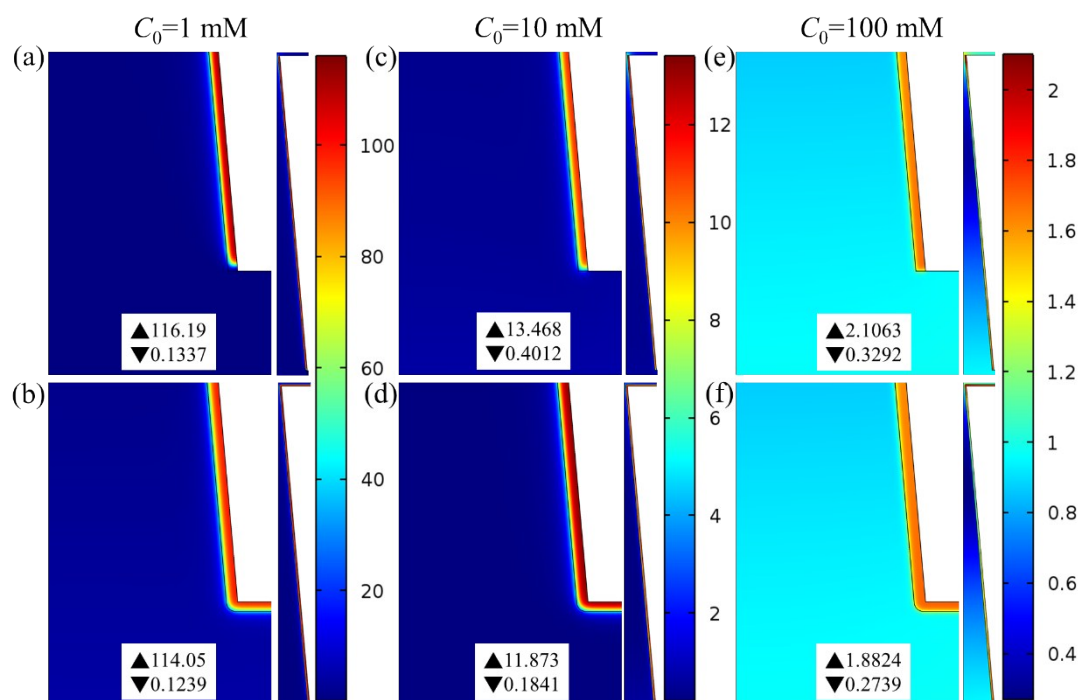

**Fig. S1** Contours of the dimensionless counterions (cations) concentration ( $c_1^*$ ) near the nanopore base region for type I nanopore, (a), (c), (e), and type II nanopore, (b), (d), (f), at various values of bulk ionic concentration and  $V_{app}=+1$  V. Color bars: level of dimensionless concentration; the number associated with ▲ (▼) denotes the maximum (minimum) value. Contours of the dimensionless counterion (cation) concentration ( $c_1^*$ ) for the entire nanopore are placed next to that of the base region.
